# Supplementary material
Source: Springer Nature journal article supplement (https://www.springermedizin.de/resource/supplementary/12981_2011_236_MOESM1_ESM.pdf/9604102)
Supplement: MOESM1 [file 9604102]

**(A)**

**ARVs received prior to starting a new salvage regimen (baseline)**

|               | No. | Drugs                          |                              |                               |                               |                               |                               |                               |                               |                               |
|---------------|-----|--------------------------------|------------------------------|-------------------------------|-------------------------------|-------------------------------|-------------------------------|-------------------------------|-------------------------------|-------------------------------|
| <b>NRTIs</b>  | >=  | <input type="text" value="0"/> | <input type="checkbox"/> AZT | <input type="checkbox"/> DDI  | <input type="checkbox"/> D4T  | <input type="checkbox"/> 3TC  | <input type="checkbox"/> FTC  | <input type="checkbox"/> ABC  | <input type="checkbox"/> TDF  |                               |
| <b>NNRTIs</b> | >=  | <input type="text" value="0"/> | <input type="checkbox"/> NVP | <input type="checkbox"/> DLV  | <input type="checkbox"/> EFV  | <input type="checkbox"/> ETR  |                               |                               |                               |                               |
| <b>PIs</b>    | >=  | <input type="text" value="0"/> | <input type="checkbox"/> NFV | <input type="checkbox"/> IDVr | <input type="checkbox"/> SQVr | <input type="checkbox"/> FPVr | <input type="checkbox"/> ATVr | <input type="checkbox"/> LPVr | <input type="checkbox"/> TPVr | <input type="checkbox"/> DRVr |
| <b>RAL</b>    | >=  | <input type="text" value="0"/> |                              |                               |                               |                               |                               |                               |                               |                               |
| <b>MVC</b>    | >=  | <input type="text" value="0"/> |                              |                               |                               |                               |                               |                               |                               |                               |
| <b>T20</b>    | >=  | <input type="text" value="0"/> |                              |                               |                               |                               |                               |                               |                               |                               |

**New salvage regimen**

|               | Yes                              | No                    | Optional                         |                              |                               |                               |                               |                               |                               |                               |                                          |
|---------------|----------------------------------|-----------------------|----------------------------------|------------------------------|-------------------------------|-------------------------------|-------------------------------|-------------------------------|-------------------------------|-------------------------------|------------------------------------------|
| <b>NRTIs</b>  | <input type="radio"/>            | <input type="radio"/> | <input checked="" type="radio"/> | <input type="checkbox"/> AZT | <input type="checkbox"/> DDI  | <input type="checkbox"/> D4T  | <input type="checkbox"/> 3TC  | <input type="checkbox"/> FTC  | <input type="checkbox"/> ABC  | <input type="checkbox"/> TDF  |                                          |
| <b>NNRTIs</b> | <input type="radio"/>            | <input type="radio"/> | <input checked="" type="radio"/> | <input type="checkbox"/> NVP | <input type="checkbox"/> DLV  | <input type="checkbox"/> EFV  | <input type="checkbox"/> ETR  |                               |                               |                               |                                          |
| <b>PIs</b>    | <input checked="" type="radio"/> | <input type="radio"/> | <input type="radio"/>            | <input type="checkbox"/> NFV | <input type="checkbox"/> IDVr | <input type="checkbox"/> SQVr | <input type="checkbox"/> FPVr | <input type="checkbox"/> ATVr | <input type="checkbox"/> LPVr | <input type="checkbox"/> TPVr | <input checked="" type="checkbox"/> DRVr |
| <b>RAL</b>    | <input checked="" type="radio"/> | <input type="radio"/> | <input type="radio"/>            |                              |                               |                               |                               |                               |                               |                               |                                          |
| <b>MVC</b>    | <input type="radio"/>            | <input type="radio"/> | <input checked="" type="radio"/> |                              |                               |                               |                               |                               |                               |                               |                                          |
| <b>T20</b>    | <input type="radio"/>            | <input type="radio"/> | <input checked="" type="radio"/> |                              |                               |                               |                               |                               |                               |                               |                                          |

**(B)**

| Query parameters                                                                     |                                                       |  |  |  |
|--------------------------------------------------------------------------------------|-------------------------------------------------------|--|--|--|
| <b>ARVs in new salvage regimen</b>                                                   | DRVr+ RAL, optionally include NNRTIs, NRTIs, MVC, T20 |  |  |  |
| <b>ARVs received prior to receiving new salvage regimen (ARVs prior to baseline)</b> |                                                       |  |  |  |
| <b>Years of therapy</b>                                                              | Any                                                   |  |  |  |
| <b>Number of regimens</b>                                                            | Any                                                   |  |  |  |
| <b>NRTI</b>                                                                          | >=0 NRTIs                                             |  |  |  |
| <b>NNRTI</b>                                                                         | >=0 NNRTIs                                            |  |  |  |
| <b>PI</b>                                                                            | >=0 PIs                                               |  |  |  |
| <b>Other</b>                                                                         | optionally received INIs, CRIs, FIs                   |  |  |  |
| <b>Number of TCEs retrieved</b>                                                      | 57                                                    |  |  |  |

| ARVs received                                                                                            | Prior to baseline                                                                                       |                                                                                                                                                                      | Post baseline        |                                             | Graphical summary |
|----------------------------------------------------------------------------------------------------------|---------------------------------------------------------------------------------------------------------|----------------------------------------------------------------------------------------------------------------------------------------------------------------------|----------------------|---------------------------------------------|-------------------|
|                                                                                                          | PR mutations                                                                                            | RT mutations                                                                                                                                                         | New salvage regimen  | Outcomes (VLoads)                           |                   |
| 3TC, ABC, ATVr, AZT, D4T, DDC, DDI, FTC, IDV, LPV, NFV, NVP, SQV, TDF                                    | 10I, 13V, 33F, 34Q, 43T, 53L, 54A, 63P, 66F, 71V, 73S, 82A, 92K                                         | 20R, 35T, 39A, 41L, 67N, 70S, 122E, 166R, 184V, 207E, 215Y, 272P, 286A, 293V, 297T                                                                                   | FTC+TDF+DRVr+RAL     | 1.9, 1.9, 1.9, 1.9                          |                   |
| 3TC, ABC, ATVr, AZT, D4T, DDC, DDI, EFV, FAPV, FAPVr, FTC, IDV, LPV, NFV, NVP, SQV, SQVr, T20, TDF, TPVr | 10F, 11I, 12P, 13V, 15V, 19P, 20T, 32I, 33F, 35G, 36I, 54V, 62V, 63P, 70T, 71I, 73S, 79A, 84V, 89V, 90M | 41L, 43E, 62V, 64R, 69G, 74V, 100I, 103N, 111I, 122E, 135T, 162Y, 164L, 184V, 208L, 210W, 211K, 215Y, 221Y, 228H, 245E, 272P, 277R                                   | FTC+TDF+DRVr+RAL+T20 | 5.8, 5.2, 3.5, 4.4, 5.2, 5.6, 5.7, 5.5, 5.8 |                   |
| 3TC, D4T, DDI, EFV, FAPVr, IDV, NVP, SQVr, TDF                                                           | 10I, 13V, 19V, 20R, 35D, 36I, 37D, 54V, 60E, 62V, 63P, 66L, 71T, 82T, 84V                               | 35I, 39A, 41L, 43Q, 44D, 67N, 69D, 75M, 107A, 108I, 109V, 118I, 122E, 123E, 162C, 178L, 179I, 184V, 189I, 190A, 196E, 202V, 208Y, 210W, 211K, 215Y, 272P, 276I, 297Q | FTC+TDF+DRVr+RAL     | 4.6, 2, 1.9, 1.9, 1.9                       |                   |
| 3TC, ABC, AZT, D4T, DDI, FAPV, IDV, LPV, NFV, NVP, SQV, SQVr, TDF                                        | 10I, 23I, 24I, 36V, 46I, 53L, 54V, 55R, 62V, 63P, 64V, 71V, 82N                                         | 20R, 35I, 41L, 43N, 44D, 60I, 67N, 118I, 122E, 169D, 179I, 210W, 211K, 215Y, 218E, 219R, 223T, 272P, 277R, 283I, 293V, 297K                                          | 3TC+ABC+ETR+DRVr+RAL | 1.9, 1.9, 1.9                               |                   |
| 3TC, ABC, AZT, D4T, DDC, DDI, EFV, FAPV, IDV, SQV                                                        | 10I, 11I, 13V, 15V, 18H, 20I, 36I, 37D, 46L, 54M, 63P, 71V, 82A, 90M, 93L                               | 6D, 27S, 41L, 43E, 44A, 67N, 74I, 90I, 103N, 108I, 118I, 122E, 142V, 158S, 162Y, 181G, 189I, 202V, 208Y, 210W, 211K, 215Y, 219N, 221Y, 223Q, 228R, 245E, 272P        | FTC+TDF+DRVr+RAL     | 2.3, 1.9, 1.9, 1.9, 1.9, 1.9                |                   |
